# Supplementary material
Source: publisher figshare collection journal article supplement (https://acs.figshare.com/ndownloader/files/10270245)
Supplement: Supplementary file 1 [file 10270245]

Supporting information

**Dynamic changes of intracellular monomer levels regulate block  
sequence of polyhydroxyalkanoates in engineered *Escherichia coli***

Ken'ichiro Matsumoto,\* Chiaki Hori, Ryunosuke Fujii, Masahiro Takaya, Takashi Ooba,  
Toshihiko Ooi, Takuya Isono, Toshifumi Satoh and Seiichi Taguchi

Division of Applied Chemistry, Faculty of Engineering, Hokkaido University, N13W8,  
Kita-ku, Sapporo 060-8628, JAPAN

## Table of contents

### Plasmid construction

**Table S1.** P(2HB-*co*-3HB) production in recombinant *E. coli* expressing PhaC1<sub>Ps</sub>STQK.

**Figure S1.** <sup>1</sup>H NMR of the polyesters synthesized in *E. coli*.

**Figure S2.** <sup>1</sup>H NMR analysis of solvent-fractionated samples of P(2HB-*b*-3HB) and blend of P(2HB) and P(3HB).

**Figure S3.** DSC thermograms of polymers composed of 2HB and 3HB.

**Figure S4.** Reaction of PhaC1<sub>Ps</sub>STQK with 2HB-CoA and 3HB-CoA.

**Plasmid construction.** The *phb* operon promoter region of *R. eutropha* was amplified by PCR using a pair of primers; AAGGTACCCGGGCAAGTACCTTGCCGACAT and TCTCTCGAGTCACTATTCGAACCGGCTCCG. The *KpnI/XhoI* fragment was inserted into the *KpnI/XhoI* sites of pBluescript KS<sup>+</sup> to yield pBSP<sub>Re</sub>. The propionyl-CoA transferase (*pct*) gene from *Megasphaera elsdenii* was amplified from pTV118NpctC1STQKAB using a pair of primers; AGATCTAGGAGGTAAACAATGAGAAAAGTAGAAATCA and GAGCTCTGCAGGTTATTTTTTCAGTC. The *BglIII/SacI* fragment was inserted into the *BamHI/SacI* sites of pBSP<sub>Re</sub> to yield pBSP<sub>Re</sub>pct. The chimeric PHA synthase gene, which is composed of PhaCs from *Aeromonas caviae* and *Ralstonia eutropha*, designated as PhaC<sub>AR</sub>, was amplified from pGEMC<sub>AcRe12</sub>AB<sup>23</sup> using a pair of primers; CGGTTCTGAATAGTGACTCGAGCCGGTTCGAATCTAGAAAT and CGATACCGTCGACCTCGACAATGGAAACGGGAGGGAAC. The amplified fragment was inserted into the *XhoI* site of pBSP<sub>Re</sub>pct using an In-Fusion dry-down PCR cloning kit (Clontech) to yield pBSP<sub>Re</sub>phaC<sub>AR</sub>pct.

**Table S1.** P(2HB-*co*-3HB) production in recombinant *E. coli* expressing PhaC1<sub>PS</sub>STQK.

| PhaC | Sodium<br>3HB<br>(g/L) | Sodium<br>2HB<br>(g/L) | Cell<br>dry<br>weight<br>(g/L) | Polymer<br>production<br>(g/L) | 2HB<br>fraction<br>(mol%) | $M_w$<br>( $\times 10^{-4}$ ) | PDI <sup>a</sup> |
|------|------------------------|------------------------|--------------------------------|--------------------------------|---------------------------|-------------------------------|------------------|
| STQK | 5                      | 5                      | 2.2 $\pm$ 0.24                 | 0.11 $\pm$ 0.01                | 51.5 $\pm$ 3.6            | 5.9                           | 1.6              |
| STQK | 5                      | 10                     | 0.66 $\pm$ 0.23                | 0.12 $\pm$ 0.01                | 88.4 $\pm$ 0.5            | 5.7                           | 2.2              |

<sup>a</sup>polydispersity index

(a) P(2HB-*b*-3HB) at 12 h

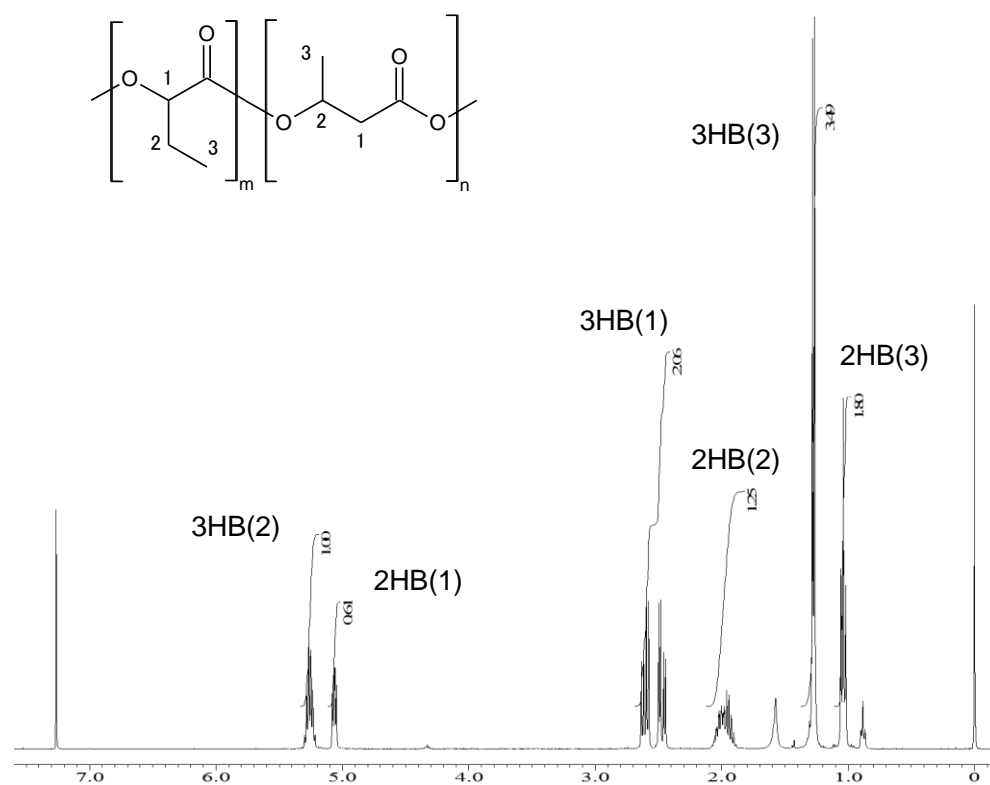

(b) P(2HB-*b*-3HB) at 18 h

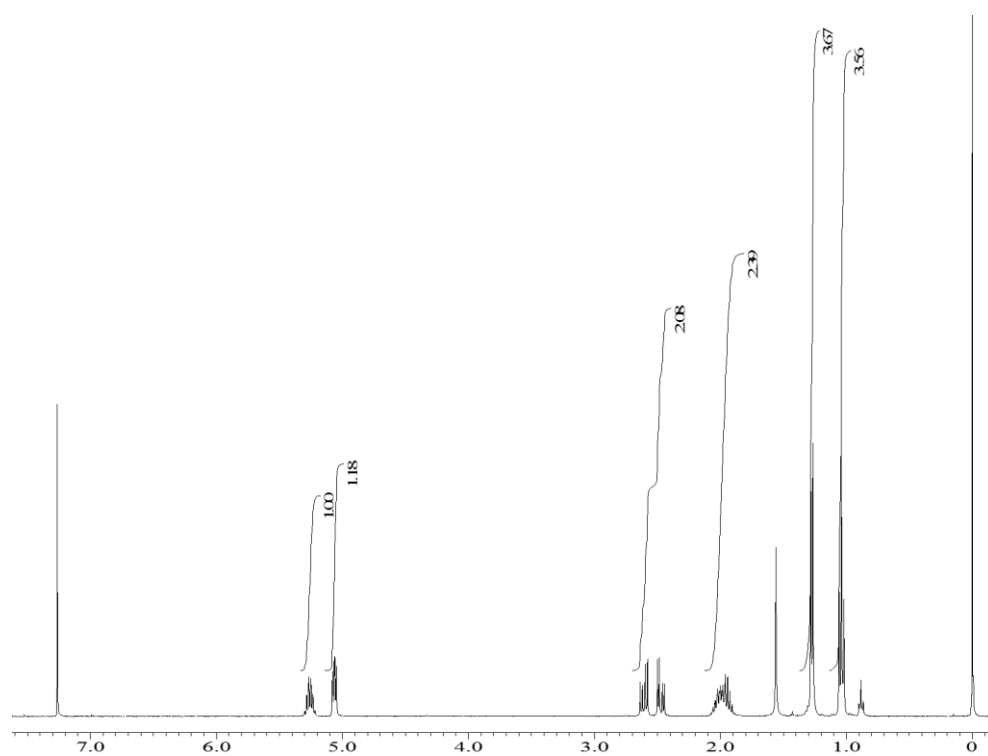

(c) P(2HB-*b*-3HB) at 24 h

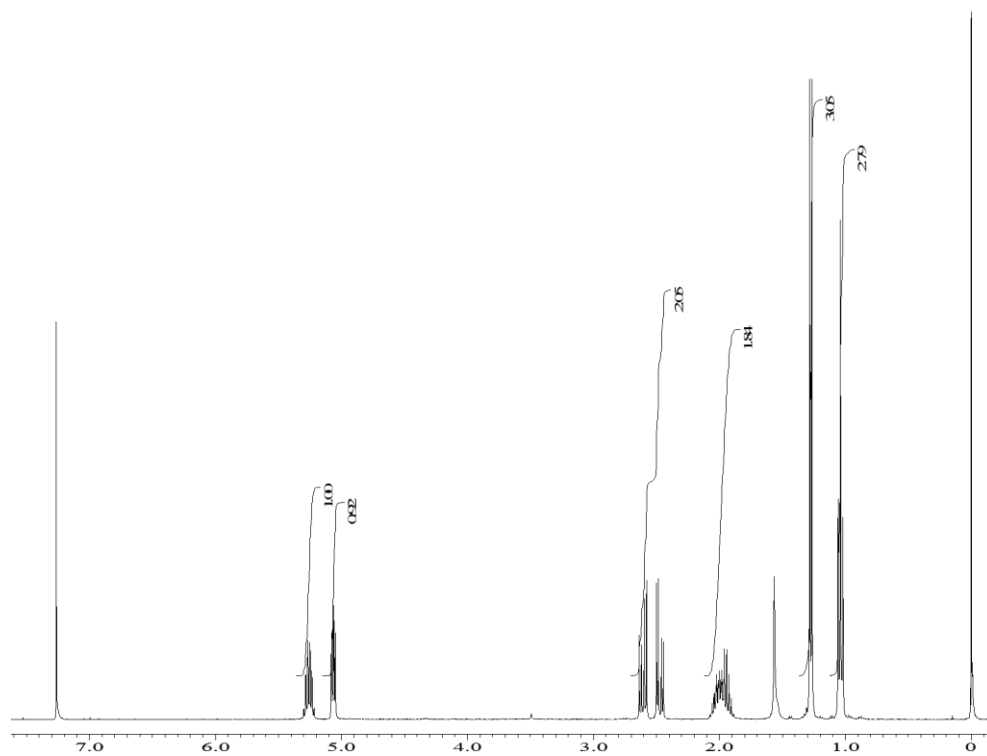

(d) P(2HB-*ran*-3HB)

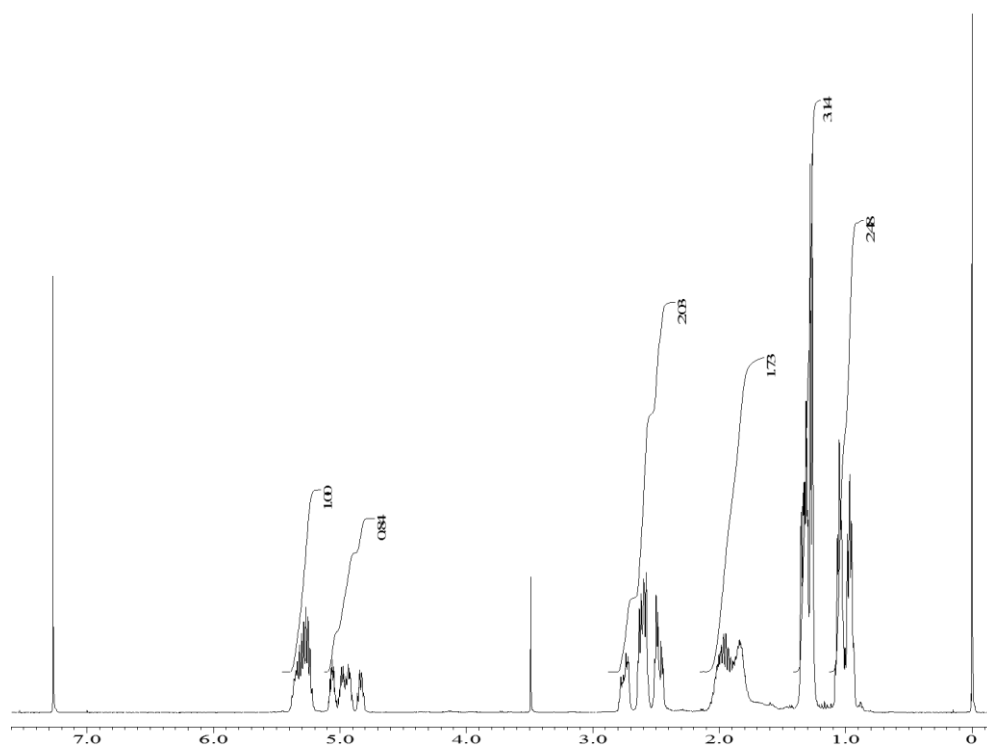

(e) P(2HB)

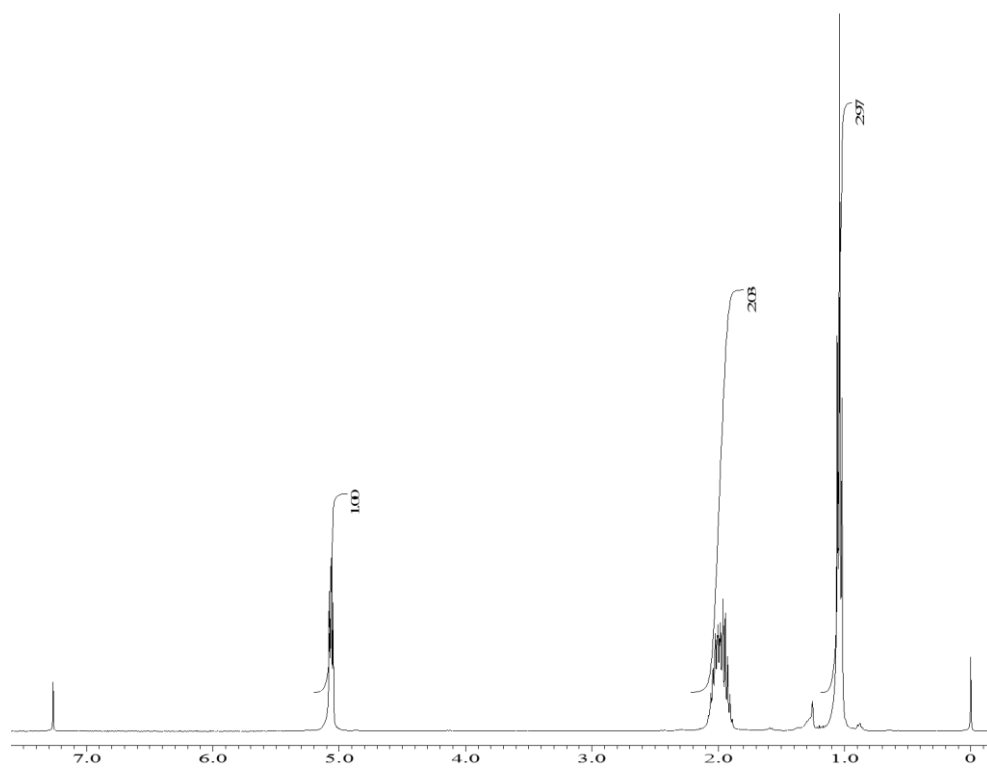

(f) P(3HB)

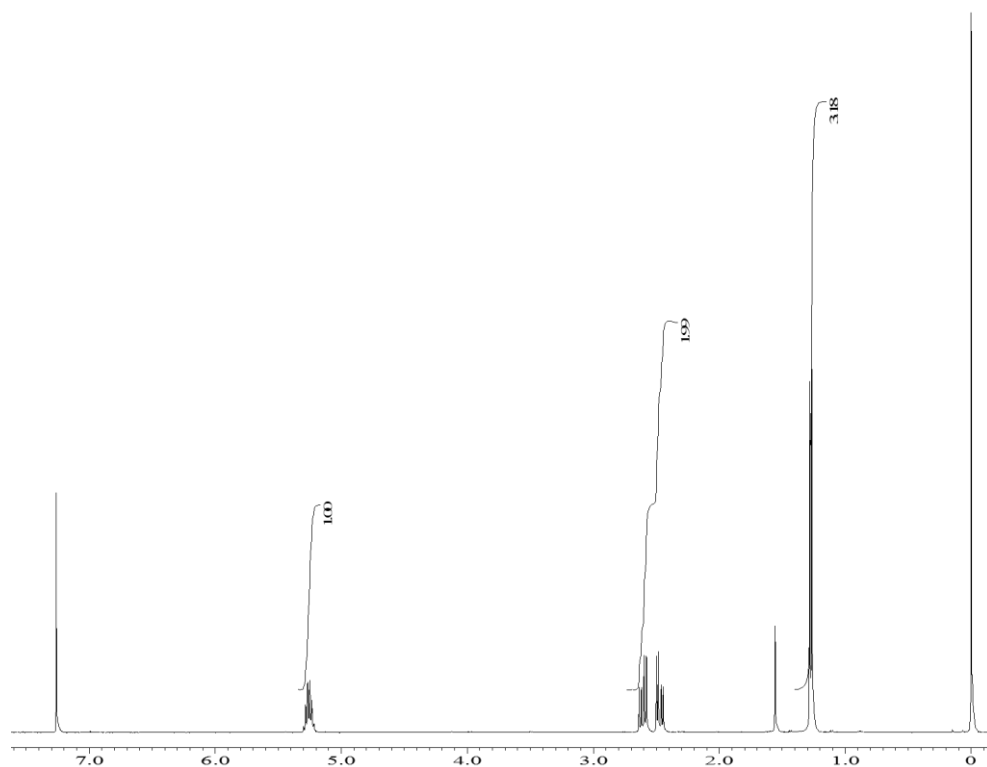

**Figure S1.** <sup>1</sup>H NMR of polyesters synthesized in *E. coli*. P(2HB-*b*-3HB) at 12 h (a), 18 h (b) and 24 h (c), P(2HB-*ran*-3HB) (d), P(2HB) (e) and P(3HB) (f).

(a) P(2HB-*b*-3HB) before fractionation

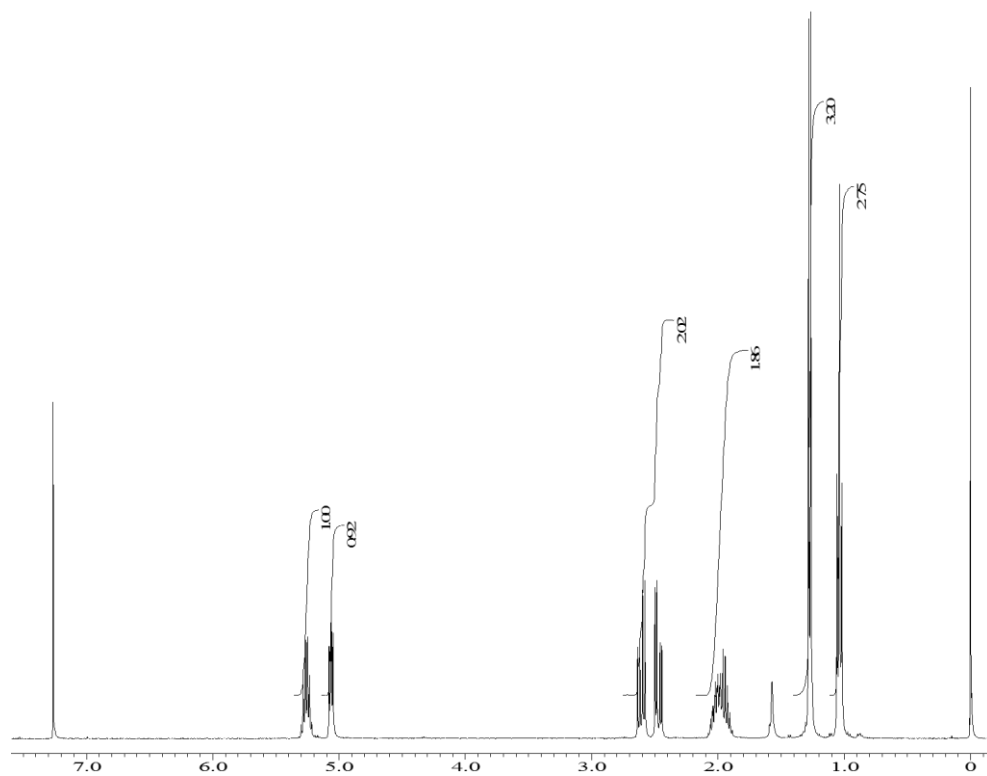

(b) THF-soluble fraction of P(2HB-*b*-3HB)

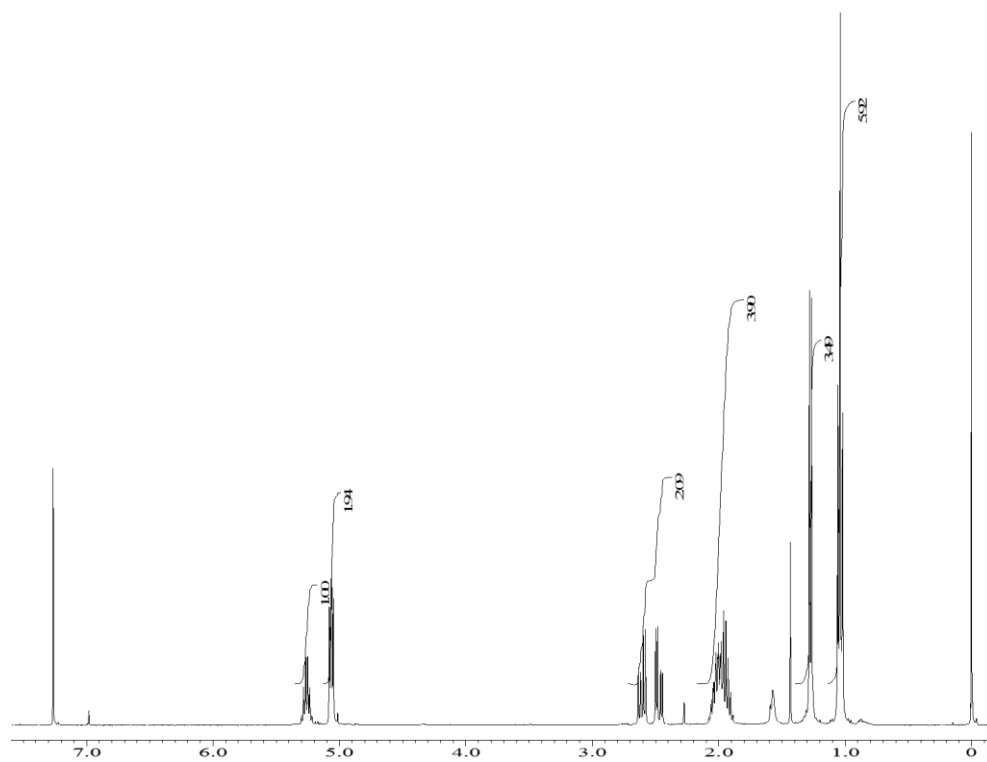



(c) THF-insoluble fraction of P(2HB-*b*-3HB)

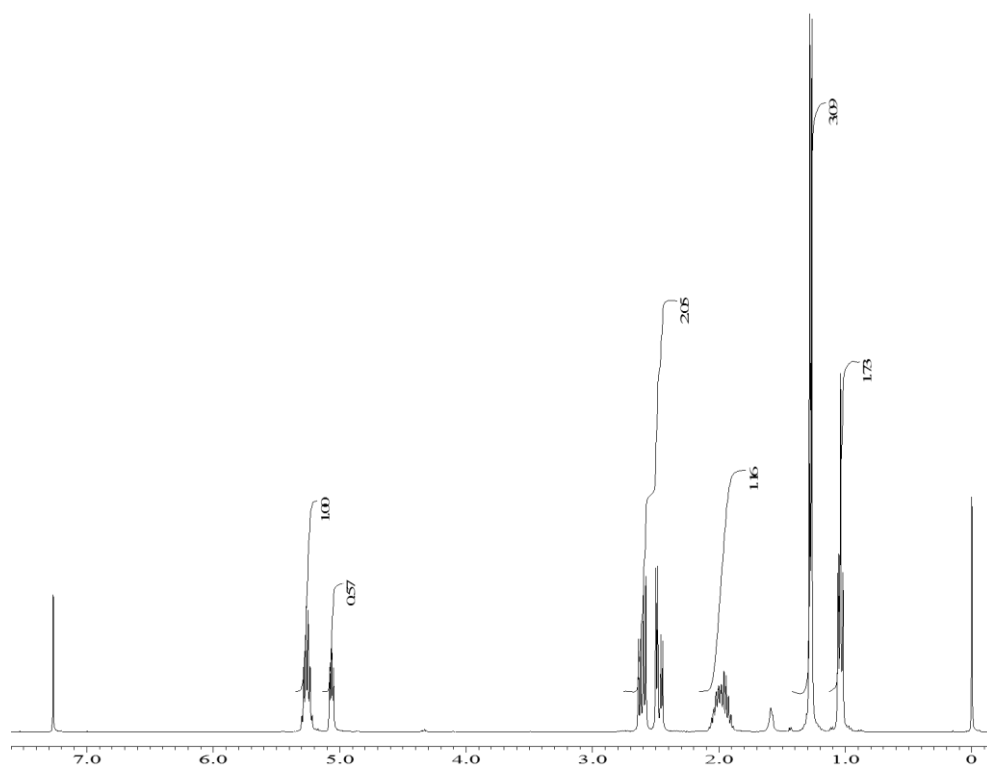

(d) a blend of P(2HB) and P(3HB)

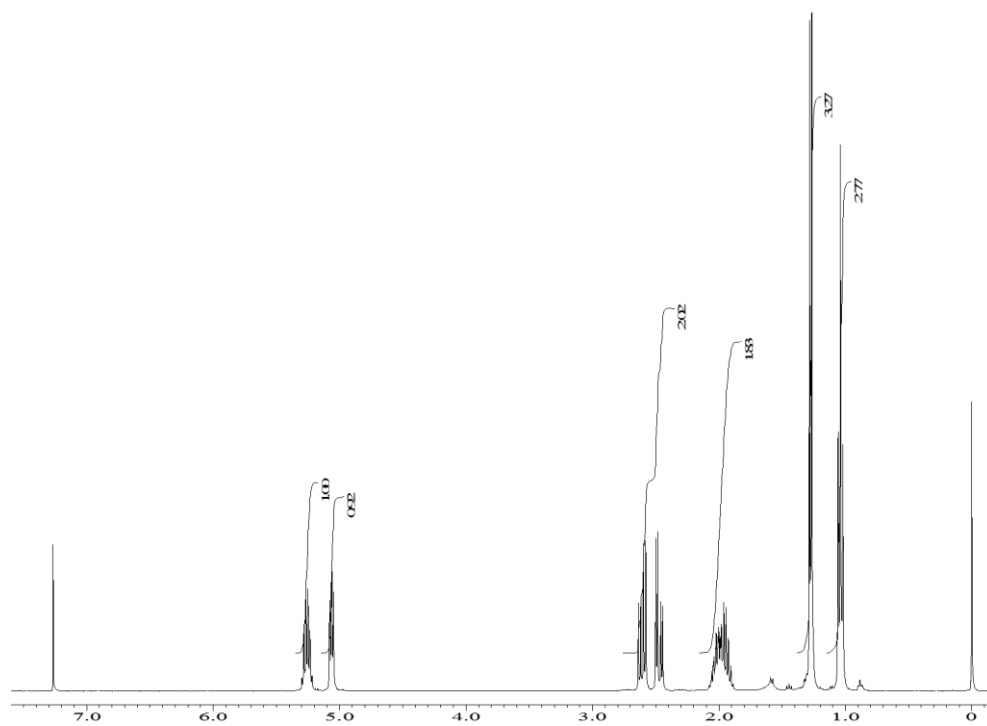

(e) THF-soluble fraction of the blend

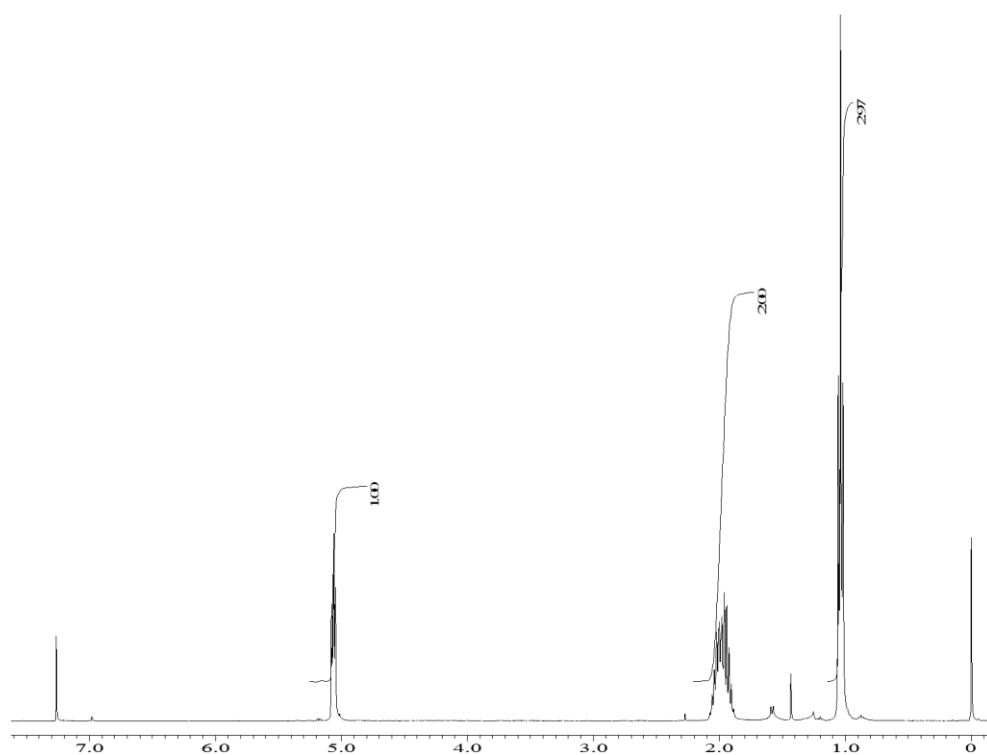

(f) THF-insoluble fraction of the blend

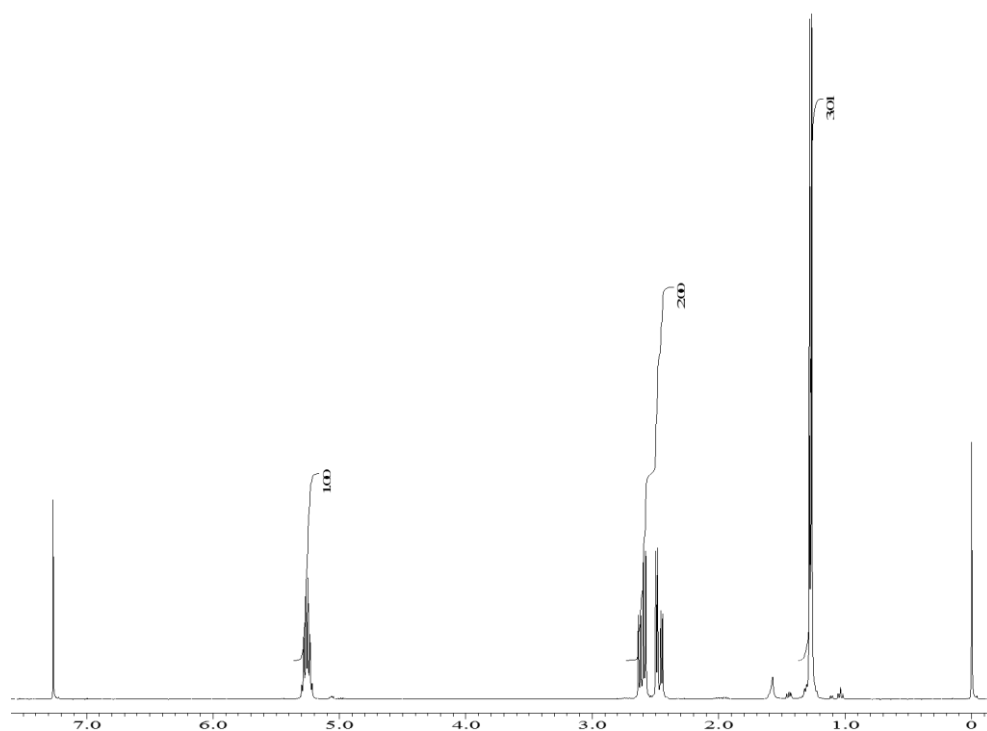

**Figure S2.**  $^1\text{H}$  NMR analysis of solvent-fractionated samples of P(2HB-*b*-3HB) and blend of P(2HB) and P(3HB). (a) P(2HB-*b*-3HB) before fractionation, (b) tetrahydrofuran (THF)-soluble fraction of P(2HB-*b*-3HB), (c) THF-insoluble fraction of P(2HB-*b*-3HB), (d) a blend of P(2HB) and P(3HB). (e) THF-soluble fraction of the blend, and (f) THF-insoluble fraction of the blend.

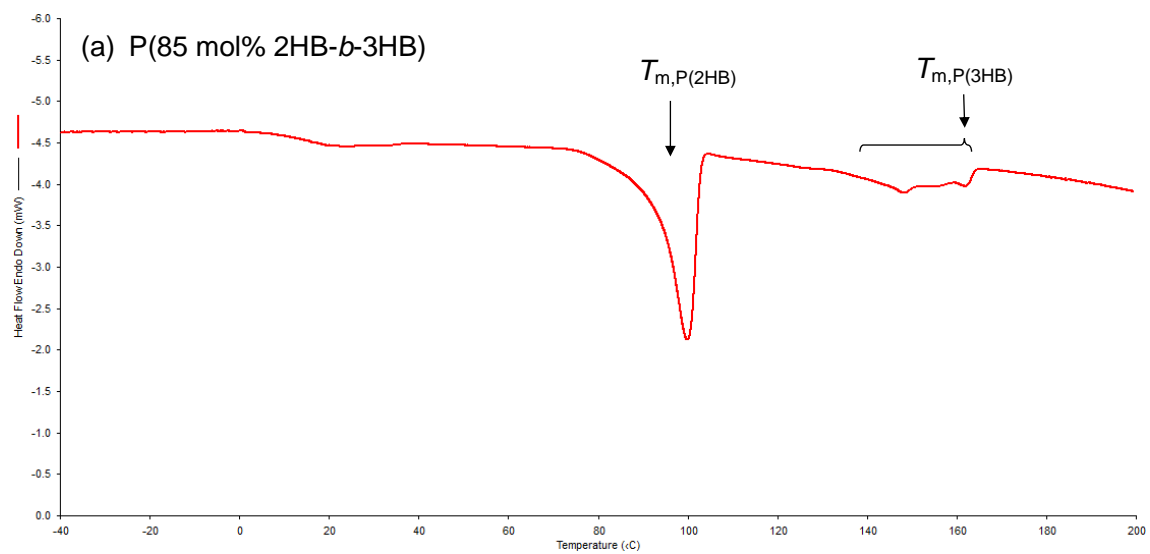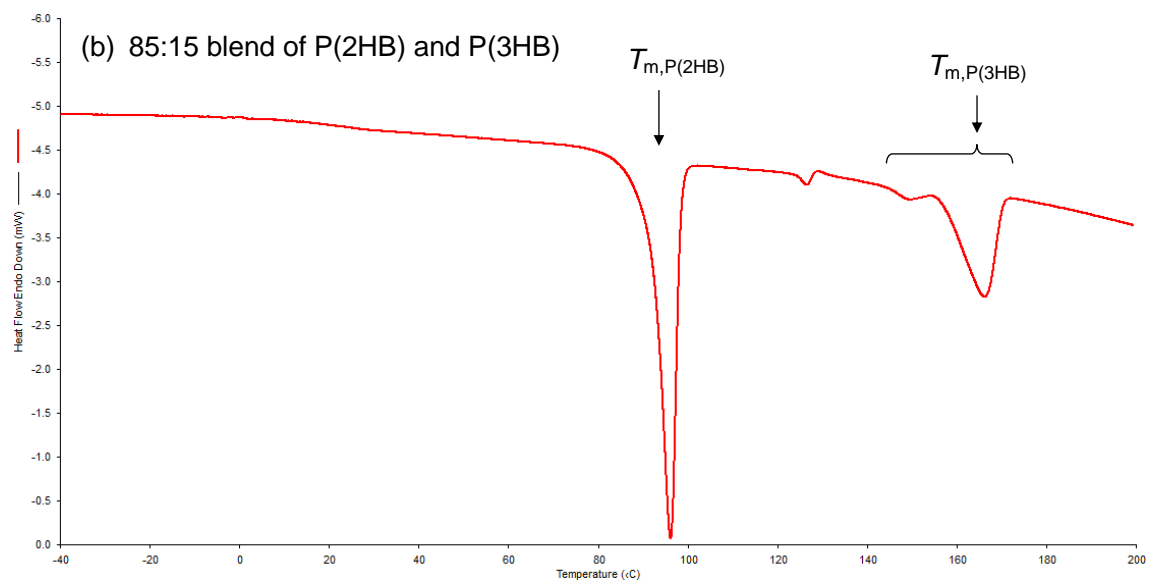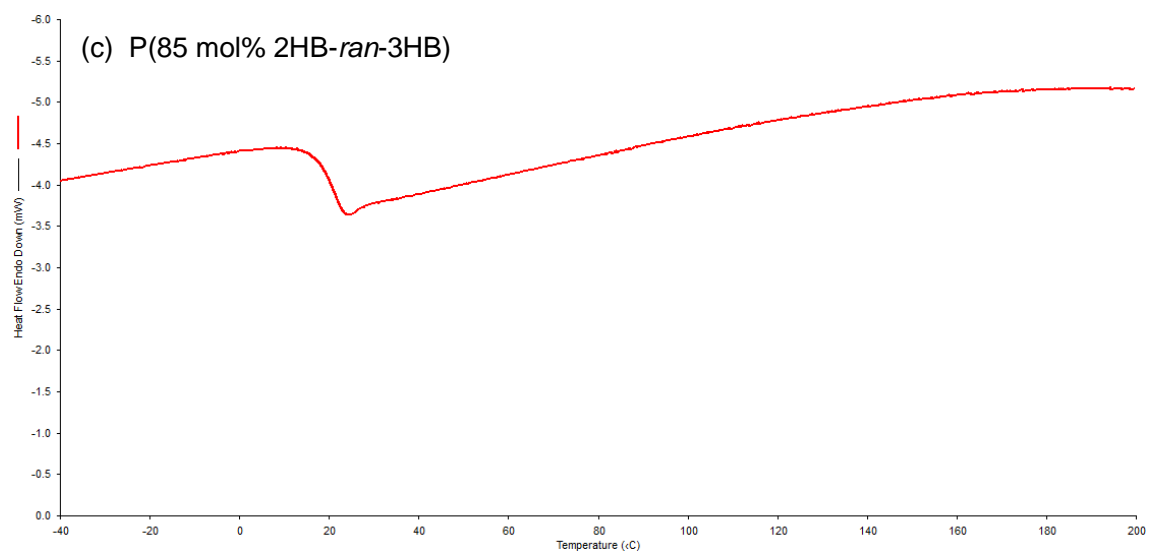

**Figure S3.** DSC thermograms of the polymers composed of 2HB and 3HB. (a) P(87 mol% 2HB-*b*-3HB), (b) a 85:15 blend of P(2HB) and P(3HB), and (c) P(85 mol% 2HB-*b*-3HB). The samples were melted at 200 °C for 3 min, rapidly cooled to 70 °C and annealed at 70 °C for 6 h for promoting crystallization. The sample was cooled to -70 °C and heated to 200 °C at heating rate of 10 °C/min. The thermogram was reported during the heating scan.

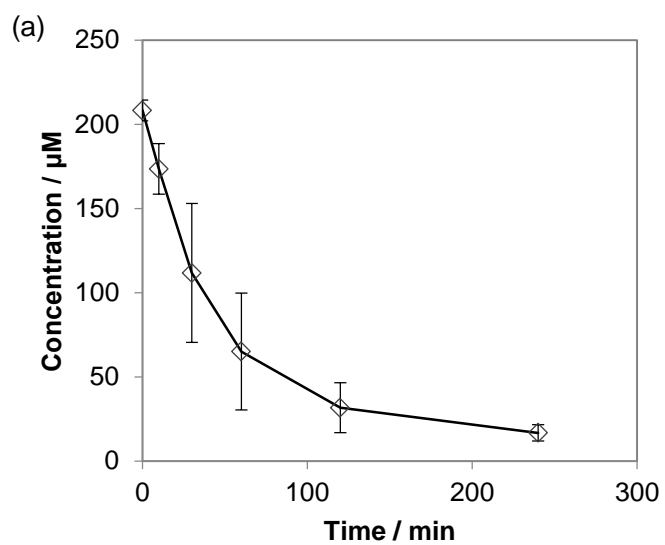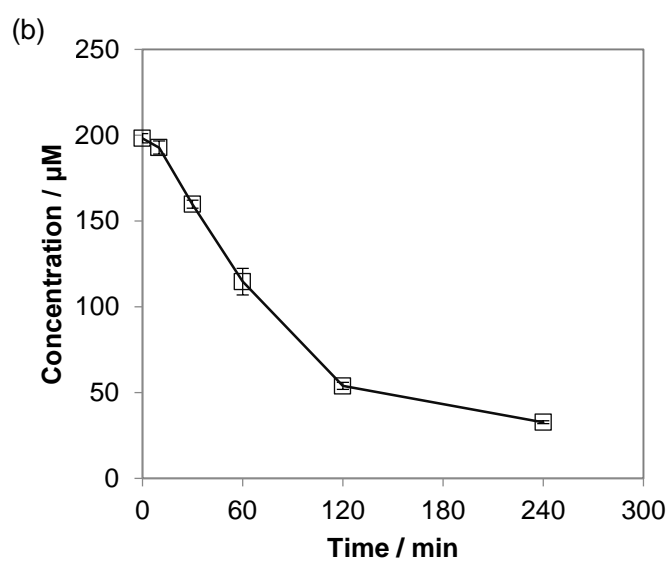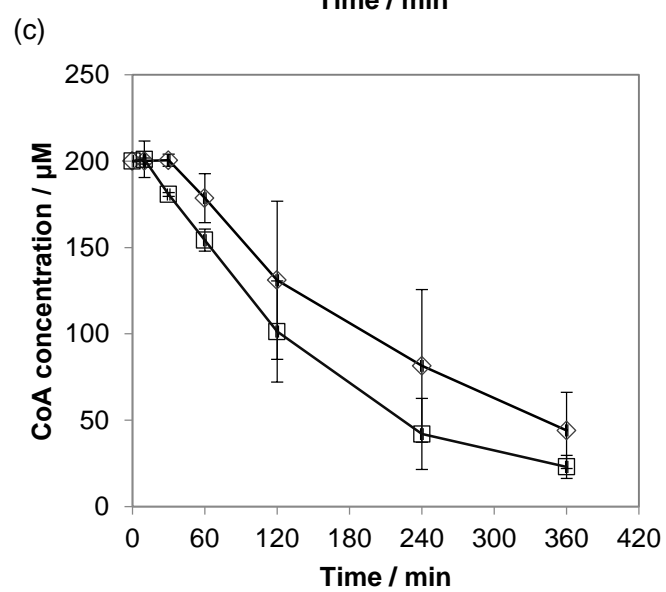

**Figure S4.** Reaction of PhaC1<sub>Ps</sub>STQK with 2HB-CoA and 3HB-CoA. (a) 3HB-CoA was used as a substrate, (b) 2HB-CoA was used as a substrate and (c) 2HB-CoA and 3HB-CoA were used as substrates. Square: 2HB-CoA, and diamond: 3HB-CoA.
